# Supplementary material for: Poly(norbornyl-NDIs) as a potential cathode-active material in rechargeable charge storage devices
Source: Royal Society of Chemistry journal article supplement (doi:10.1039/c6ra06103f), 2016-01-01
Supplement: c6ra06103f1.pdf [file c6ra06103f1.pdf]

## Supplementary Information

### Poly(norbornyl-NDIs) as a Potential Cathode-Active Material in Rechargeable Charge Storage Devices

*Y. Sasada,<sup>a)</sup> S. J. Langford,<sup>\*b)</sup> K. Oyaizu,<sup>a)</sup> and H. Nishide<sup>\*a)</sup>*

a) Department of Applied Chemistry, Waseda University, Tokyo 169-8555, Japan

b) School of Chemistry, Monash University, Clayton, Victoria 3800, Australia

## Experimental

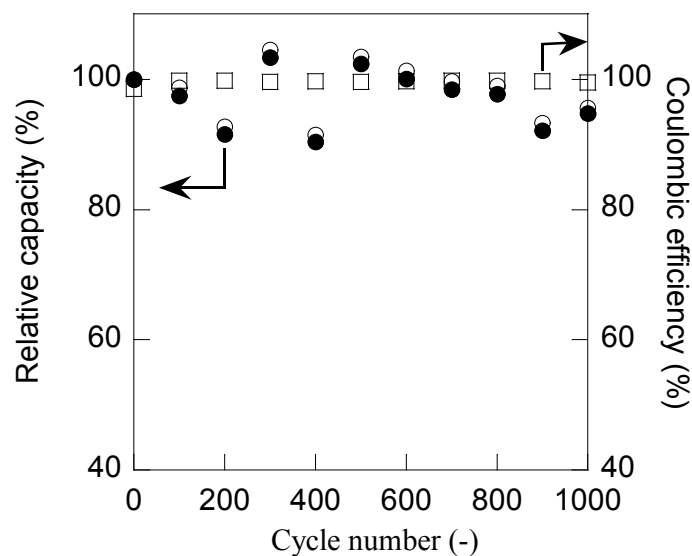

**Fig. S1** Cycle performance of the Li coin-cell fabricated with **1** cathode at 10 C (●: charging, ○: discharging, □: coulombic efficiency).
